# Supplementary material for: Multilocus sequence analysis of Anaplasma phagocytophilum reveals three distinct lineages with different host ranges in clinically ill French cattle
Source: Springer Nature journal article supplement (doi:10.1186/s13567-014-0114-7), 2014-12-01
Supplement: MOESM1 [file 13567_2014_114_MOESM1_ESM.pdf]

| Sequence_id | Species | Tissue | French region<br>(« département ») | <i>ankA</i><br>cluster <sup>a</sup> | Supertree<br>cluster <sup>b</sup> |
|-------------|---------|--------|------------------------------------|-------------------------------------|-----------------------------------|
| AU-BO-01    | CATTLE  | blood  | Cantal (15)                        | 4                                   | B                                 |
| BL-HO-01    | HORSE   | blood  | BELGIUM                            | 1                                   | -                                 |
| BL-HO-02    | HORSE   | blood  | BELGIUM                            | -                                   | C                                 |
| BO-BO-01    | CATTLE  | blood  | Côte-d'Or (21)                     | 4                                   | B                                 |
| BR-BO-02    | CATTLE  | blood  | Idre (Idre (36))                   | 4                                   | -                                 |
| BR-BO-03    | CATTLE  | blood  | Côtes-d'Armor (22)                 | 1                                   | C                                 |
| BR-BO-04    | CATTLE  | blood  | Côtes-d'Armor (22)                 | 4                                   | B                                 |
| BR-BO-05    | CATTLE  | blood  | Tarn-et-Garonne (82)               | 1                                   | -                                 |
| BR-BO-06    | CATTLE  | blood  | Côtes-d'Armor (22)                 | 1                                   | C                                 |
| BR-BO-07    | CATTLE  | blood  | Ille-et-Vilaine (35)               | 1                                   | C                                 |
| BR-BO-08    | CATTLE  | blood  | Finistère (29)                     | 2                                   | A                                 |
| BR-BO-09    | CATTLE  | blood  | Côtes-d'Armor (22)                 | 4                                   | C                                 |
| BR-BO-10    | CATTLE  | blood  | Ille-et-Vilaine (35)               | -                                   | C                                 |
| BR-BO-11    | CATTLE  | blood  | Morbihan (56)                      | 1                                   | C                                 |
| BR-BO-12    | CATTLE  | blood  | Aveyron (12)                       | 1                                   | -                                 |
| BR-BO-13    | CATTLE  | blood  | Morbihan (56)                      | NA                                  | -                                 |
| BR-BO-14    | CATTLE  | blood  | Lozère (48)                        | 4                                   | C                                 |
| BR-BO-15    | CATTLE  | blood  | Finistère (29)                     | 4                                   | B                                 |
| BR-BO-16    | CATTLE  | blood  | Côtes-d'Armor (22)                 | 4                                   | B                                 |
| BR-BO-17    | CATTLE  | blood  | Morbihan (56)                      | 4                                   | B                                 |
| BR-BO-19    | CATTLE  | blood  | Côtes-d'Armor (22)                 | 4                                   | -                                 |
| BR-BO-20    | CATTLE  | blood  | Finistère (29)                     | 4                                   | B                                 |
| BR-BO-21    | CATTLE  | blood  | Finistère (29)                     | 1                                   | C                                 |
| BR-BO-22    | CATTLE  | blood  | Finistère (29)                     | 1                                   | C                                 |
| BR-BO-23    | CATTLE  | blood  | Morbihan (56)                      | 4                                   | B                                 |
| BR-BO-24    | CATTLE  | blood  | Morbihan (56)                      | 4                                   | B                                 |
| BR-BO-25    | CATTLE  | blood  | Morbihan (56)                      | 4                                   | B                                 |
| BR-BO-26    | CATTLE  | blood  | Morbihan (56)                      | 1                                   | C                                 |
| BR-BO-27    | CATTLE  | blood  | Morbihan (56)                      | 1                                   | C                                 |
| BR-BO-28    | CATTLE  | blood  | Morbihan (56)                      | 1                                   | C                                 |
| BR-BO-29    | CATTLE  | blood  | Finistère (29)                     | 1                                   | C                                 |
| BR-BO-30    | CATTLE  | blood  | Ille-et-Vilaine (35)               | 1                                   | C                                 |
| BR-BO-31    | CATTLE  | blood  | Ille-et-Vilaine (35)               | 4                                   | B                                 |
| BR-BO-32    | CATTLE  | blood  | Ille-et-Vilaine (35)               | 4                                   | B                                 |
| BR-BO-33    | CATTLE  | blood  | Ille-et-Vilaine (35)               | 4                                   | B                                 |
| BR-BO-34    | CATTLE  | blood  | Ille-et-Vilaine (35)               | 4                                   | B                                 |
| BR-BO-35    | CATTLE  | blood  | Côtes-d'Armor (22)                 | 4                                   | B                                 |
| BR-BO-36    | CATTLE  | blood  | Côtes-d'Armor (22)                 | 1                                   | C                                 |
| BR-BO-37    | CATTLE  | blood  | Côtes-d'Armor (22)                 | 1                                   | -                                 |
| BR-BO-38    | CATTLE  | blood  | Morbihan (56)                      | 4                                   | B                                 |
| BR-BO-39    | CATTLE  | blood  | Côtes-d'Armor (22)                 | 1                                   | -                                 |
| BR-BO-40    | CATTLE  | blood  | Morbihan (56)                      | 1                                   | C                                 |
| BR-BO-41    | CATTLE  | blood  | Morbihan (56)                      | 4                                   | B                                 |
| BR-BO-42    | CATTLE  | blood  | Côtes-d'Armor (22)                 | 4                                   | B                                 |

|          |          |       |                      |    |   |
|----------|----------|-------|----------------------|----|---|
| BR-BO-43 | CATTLE   | blood | Côtes-d'Armor (22)   | 4  | B |
| BR-BO-44 | CATTLE   | blood | Morbihan (56)        | 4  | B |
| BR-BO-45 | CATTLE   | blood | Côtes-d'Armor (22)   | 4  | B |
| BR-BO-46 | CATTLE   | blood | Côtes-d'Armor (22)   | 2  | A |
| BR-BO-47 | CATTLE   | blood | Finistère (29)       | -  | B |
| BR-BO-48 | CATTLE   | blood | Finistère (29)       | 1  | C |
| BR-BO-49 | CATTLE   | blood | Mayenne (53)         | 4  | - |
| BR-BO-50 | CATTLE   | blood | Finistère (29)       | NA | - |
| BR-BO-51 | CATTLE   | blood | Morbihan (56)        | 4  | B |
| BR-BO-52 | CATTLE   | blood | Finistère (29)       | 1  | - |
| BR-BO-54 | CATTLE   | blood | Finistère (29)       | NA | B |
| BR-BO-55 | CATTLE   | blood | Côtes-d'Armor (22)   | 1  | - |
| BR-BO-56 | CATTLE   | blood | Morbihan (56)        | 4  | B |
| BR-BO-58 | CATTLE   | blood | Morbihan (56)        | 1  | C |
| BR-BO-59 | CATTLE   | blood | Ille-et-Vilaine (35) | 1  | C |
| BR-BO-60 | CATTLE   | blood | Morbihan (56)        | 1  | - |
| BR-BO-62 | CATTLE   | blood | Ille-et-Vilaine (35) | 4  | - |
| BR-BO-63 | CATTLE   | blood | Côtes-d'Armor (22)   | 2  | - |
| BR-BO-64 | CATTLE   | blood | Finistère (29)       | 1  | - |
| CE-BO-01 | CATTLE   | blood | Idre (36)            | 1  | C |
| CE-BO-02 | CATTLE   | blood | Idre (36)            | NA | - |
| CE-BO-03 | CATTLE   | blood | Idre (36)            | 1  | C |
| CRL-12   | ROE DEER | blood | Doubs (25)           | NA | - |
| CRL-19   | ROE DEER | blood | Doubs (25)           | NA | - |
| CRL-22   | ROE DEER | blood | Doubs (25)           | 3  | - |
| CRL-3    | ROE DEER | blood | Doubs (25)           | NA | A |
| CRL-7    | ROE DEER | blood | Doubs (25)           | NA | - |
| FC-BO-01 | CATTLE   | blood | Doubs (25)           | 4  | B |
| FC-BO-02 | CATTLE   | blood | Doubs (25)           | 4  | B |
| IF-HO-02 | HORSE    | blood | Seine-et-Marne (77)  | 1  | - |
| IF-HO-04 | HORSE    | blood | Seine-et-Marne (77)  | 1  | C |
| IF-HO-05 | HORSE    | blood | Seine-et-Marne (77)  | 1  | - |
| IF-HO-08 | HORSE    | blood | Essone (91)          | 1  | C |
| IF-HO-09 | HORSE    | blood | Seine-et-Marne (77)  | NA | - |
| IF-HO-10 | HORSE    | blood | Val-de-Marne (94)    | 1  | C |
| IF-HO-11 | HORSE    | blood | Yvelines (78)        | 1  | C |
| LI-BO-33 | CATTLE   | blood | Haute-Vienne (87)    | NA | - |
| LI-BO-55 | CATTLE   | blood | Haute-Vienne (87)    | 1  | - |
| LI-BO-80 | CATTLE   | blood | Haute-Vienne (87)    | NA | - |
| LO-BO-04 | CATTLE   | blood | Moselle (57)         | -  | B |
| MP-BO-01 | CATTLE   | blood | Hauts-Pyrénées (65)  | 1  | C |
| MP-BO-02 | CATTLE   | blood | Lot (46)             | NA | - |
| MP-CH-02 | ROE DEER | blood | Haute-Garonne (31)   | 2  | - |
| MP-CH-05 | ROE DEER | blood | Haute-Garonne (31)   | 2  | - |
| MP-CH-06 | ROE DEER | blood | Haute-Garonne (31)   | 3  | - |

|          |          |          |                    |    |   |
|----------|----------|----------|--------------------|----|---|
| MP-CH-08 | ROE DEER | blood    | Haute-Garonne (31) | -  | - |
| MP-CH-10 | ROE DEER | blood    | Haute-Garonne (31) | 3  | - |
| MP-CH-11 | ROE DEER | blood    | Haute-Garonne (31) | -  | - |
| MP-CH-12 | ROE DEER | blood    | Haute-Garonne (31) | 3  | - |
| MP-CH-14 | ROE DEER | blood    | Haute-Garonne (31) | 3  | - |
| MP-CH-15 | ROE DEER | blood    | Haute-Garonne (31) | -  | - |
| MP-CH-16 | ROE DEER | blood    | Haute-Garonne (31) | 2  | - |
| MP-CH-17 | ROE DEER | blood    | Haute-Garonne (31) | 2  | - |
| MP-CH-19 | ROE DEER | blood    | Haute-Garonne (31) | 3  | - |
| MP-CH-24 | ROE DEER | blood    | Haute-Garonne (31) | 2  | - |
| MP-CH-25 | ROE DEER | blood    | Haute-Garonne (31) | 2  | - |
| MP-CH-26 | ROE DEER | blood    | Haute-Garonne (31) | 2  | - |
| MP-CH-29 | ROE DEER | blood    | Haute-Garonne (31) | 2  | - |
| MP-CH-32 | ROE DEER | blood    | Haute-Garonne (31) | 2  | - |
| MP-CH-33 | ROE DEER | blood    | Haute-Garonne (31) | 2  | - |
| MP-CH-34 | ROE DEER | blood    | Haute-Garonne (31) | -  | - |
| MP-CH-35 | ROE DEER | blood    | Haute-Garonne (31) | -  | - |
| MP-CH-39 | ROE DEER | blood    | Haute-Garonne (31) | 2  | - |
| MP-CH-40 | ROE DEER | blood    | Haute-Garonne (31) | NA | A |
| MP-CH-41 | ROE DEER | blood    | Haute-Garonne (31) | NA | - |
| MP-CH-58 | ROE DEER | blood    | Haute-Garonne (31) | 2  | A |
| MP-CH-61 | ROE DEER | blood    | Haute-Garonne (31) | NA | - |
| MP-CH-63 | ROE DEER | blood    | Haute-Garonne (31) | -  | - |
| MP-CH-64 | ROE DEER | blood    | Haute-Garonne (31) | 2  | - |
| MP-CH-65 | ROE DEER | blood    | Haute-Garonne (31) | 2  | A |
| MP-CH-66 | ROE DEER | blood    | Haute-Garonne (31) | NA | - |
| MP-CH-68 | ROE DEER | blood    | Haute-Garonne (31) | NA | - |
| MP-CH-69 | ROE DEER | blood    | Haute-Garonne (31) | NA | - |
| MP-CH-70 | ROE DEER | blood    | Haute-Garonne (31) | NA | - |
| NO-BO-01 | CATTLE   | blood    | Calvados (14)      | 4  | B |
| NO-BO-02 | CATTLE   | blood    | Calvados (14)      | 4  | B |
| NO-BO-03 | CATTLE   | blood    | Pas-de-Calais (62) | 4  | B |
| NO-BO-04 | CATTLE   | blood    | Calvados (14)      | 1  | C |
| NO-BO-05 | CATTLE   | blood    | Calvados (14)      | 1  | C |
| NO-BO-06 | CATTLE   | blood    | Calvados (14)      | 4  | B |
| NO-BO-07 | CATTLE   | blood    | Calvados (14)      | 4  | B |
| NO-BO-09 | CATTLE   | blood    | Calvados (14)      | 1  | - |
| NO-BO-10 | CATTLE   | blood    | Calvados (14)      | NA | - |
| NO-BO-12 | CATTLE   | placenta | Calvados (14)      | NA | - |
| NO-BO-14 | CATTLE   | mucus    | Calvados (14)      | NA | - |
| NO-BO-15 | CATTLE   | placenta | Calvados (14)      | 1  | - |
| NO-BO-16 | CATTLE   | placenta | Calvados (14)      | -  | - |
| NO-BO-18 | CATTLE   | placenta | Calvados (14)      | 4  | - |
| NO-BO-19 | CATTLE   | placenta | Calvados (14)      | 1  | B |
| NO-BO-20 | CATTLE   | placenta | Calvados (14)      | 1  | - |

|          |          |       |                     |    |   |
|----------|----------|-------|---------------------|----|---|
| NO-BO-21 | CATTLE   | blood | Calvados (14)       | NA | - |
| NO-BO-22 | CATTLE   | blood | Manche (50)         | 1  | C |
| NO-BO-23 | CATTLE   | blood | Calvados (14)       | NA | - |
| NO-BO-24 | CATTLE   | blood | Calvados (14)       | 4  | B |
| NO-BO-25 | CATTLE   | blood | Calvados (14)       | 4  | B |
| NO-BO-26 | CATTLE   | blood | Calvados (14)       | 1  | B |
| NO-BO-27 | CATTLE   | blood | Calvados (14)       | 4  | B |
| PL-BO-01 | CATTLE   | blood | Mayenne (53)        | 4  | B |
| PL-BO-02 | CATTLE   | blood | Mayenne (53)        | 4  | B |
| PL-BO-03 | CATTLE   | blood | Mayenne (53)        | 1  | C |
| RA-BO-01 | CATTLE   | blood | Haute-Savoie (74)   | 4  | B |
| RA-BO-02 | CATTLE   | blood | Rhône (69)          | NA | - |
| RA-BO-03 | CATTLE   | blood | Rhône (69)          | 4  | C |
| RA-BO-04 | CATTLE   | blood | Rhône (69)          | 1  | - |
| RA-BO-05 | CATTLE   | blood | Rhône (69)          | 1  | C |
| RA-BO-08 | CATTLE   | blood | Loire (42)          | 4  | B |
| RA-DO-01 | DOG      | blood | Rhône (69)          | NA | C |
| RA-DO-02 | DOG      | blood | Saône-et-Loire (71) | 1  | C |
| RA-DO-03 | DOG      | blood | Rhône (69)          | 1  | C |
| RA-HO-02 | HORSE    | blood | Doubs (25)          | 1  | C |
| RA-HO-03 | HORSE    | blood | Rhône (69)          | 1  | C |
| RA-HO-04 | HORSE    | blood | Seine-et-Marne (77) | 1  | C |
| RA-HO-05 | HORSE    | blood | Saône-et-Loire (71) | 1  | C |
| CALL2    | ROE DEER | blood | Côtes-d'Armor (22)  | NA | - |
| PLO2     | ROE DEER | blood | Côtes-d'Armor (22)  | NA | - |
| PLU      | ROE DEER | blood | Côtes-d'Armor (22)  | NA | - |
