# Supplementary material for: Multilocus sequence analysis of Anaplasma phagocytophilum reveals three distinct lineages with different host ranges in clinically ill French cattle
Source: Springer Nature journal article supplement (doi:10.1186/s13567-014-0114-7), 2014-12-01
Supplement: MOESM2 [file 13567_2014_114_MOESM2_ESM.pdf]

| <b>Locus</b>           | <b>Primers</b>                         | <b>Sequence en 3'→ 5'</b>                          | <b>Annealing temperature</b> |
|------------------------|----------------------------------------|----------------------------------------------------|------------------------------|
| ankA external          | Fi_ankA<br>Ri_ankA                     | ATRTTACGCTGTRRTRGCAT<br>CATCTRCHGGTGTTYTCCCTC      | 58 °C                        |
| ankA internal          | Fe_ankA<br>Re2_ankA                    | TATGCGRTTCGTGAAGCA<br>TTAAAAAGCATYTTTCTGWAAC       | 58 °C                        |
| msp4 external          | msp4_Fb1<br>msp4_Rb1                   | ATAATGATGCGTCTGATGTTAGCG<br>CCTTTCCTCTATAAGCCAATT  | 59 °C                        |
| msp4 internal          | msp4_Fb1<br>msp4_Rb2                   | ATAATGATGCGTCTGATGTTAGCG<br>CAGGCAAGTCAGTATGCATAAC | 59 °C                        |
| groEL external *       | HS1a<br>HS6a                           | AZTGGGCTGGTAZTGAAT<br>CCZCCZGGZACZAZACCTTC         | 48 °C                        |
| groEL internal *       | HS43<br>HSVR                           | ATWGCWAARGAAGCATAGTC<br>CTCAACAGCAGCTCTAGTAGC      | 48 °C                        |
| polA external          | F1_pola_deg<br>R3_pola_deg             | GCAGATTAYTCVCARATGGARC<br>GCVGTACCYTGKATTGGWG      | 57 °C                        |
| polA internal          | F1_pola_deg<br>R4_pola_deg             | GCAGATTAYTCVCARATGGARC<br>GTACCYTGKATTGGWGCRTT     | 57 °C                        |
| typA external          | E2_typA_F<br>E2_typA_R                 | CCTGGACATGCTGACTTCGG<br>CGGCGGAACCTCACAG           | 66 °C                        |
| typA internal          | F-typA<br>R-typA                       | TGCCTCTGAGGGCCCTATGCC<br>AGCCCTTTCCAGCCCTGCAAC     | 69 °C                        |
| recG external          | recG_degF1<br>recG_degR2               | CGRCTTGTAGTYATAGATG<br>TCRATGACAATKATSGTWGC        | 57 °C                        |
| recG internal          | recG_degF2<br>recG_degR2               | GATGARCARCARMGSTTYGG<br>TCRATGACAATKATSGTWGC       | 57 °C                        |
| pleD external          | E2_pleD_R<br>R_pleD                    | ACAAGTGGCCCTGAAGCAAT<br>TGCGTCGTAGCCTGTCTGCA       | 66 °C                        |
| gyrA external          | Fint-gyrA<br>Rext-gyrA                 | GATAGTCAGGGAAACTTCGG<br>GGCATGACACTAGTAATGGTC      | 61 °C                        |
| gyrA internal          | Fint-gyrA<br>Rint-gyrA                 | GATAGTCAGGGAAACTTCGG<br>CATGTACGCTCCCTAAGCG        | 64 °C                        |
| CtrA-APH_1100 external | E1_aph1099-1100_F<br>E1_aph1099-1100_R | ACAGTGCCCAACCTAGACGA<br>TGGAAGAACACGGTGGTTGC       | 64 °C                        |
| CtrA-APH_1100 internal | f_aph1099-1100<br>r_aph1099-1100       | GTTGCACATCCTGCTGGGGTGT<br>GCCCTCTGCAGACAAAGAAGC    | 69 °C                        |
