# Supplementary material for: Multilocus sequence analysis of Anaplasma phagocytophilum reveals three distinct lineages with different host ranges in clinically ill French cattle
Source: Springer Nature journal article supplement (doi:10.1186/s13567-014-0114-7), 2014-12-01

d)

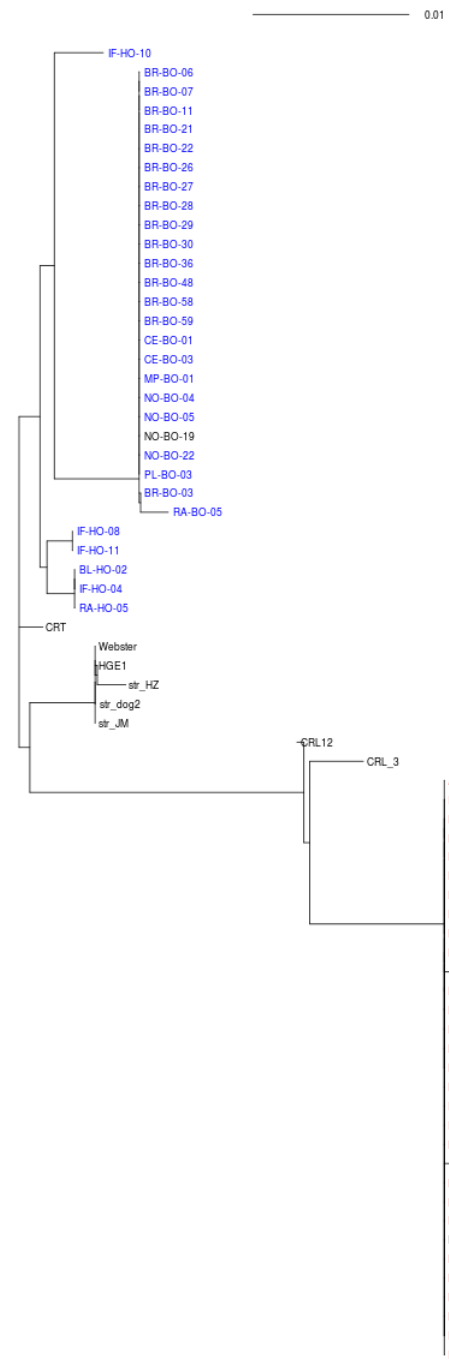

e)

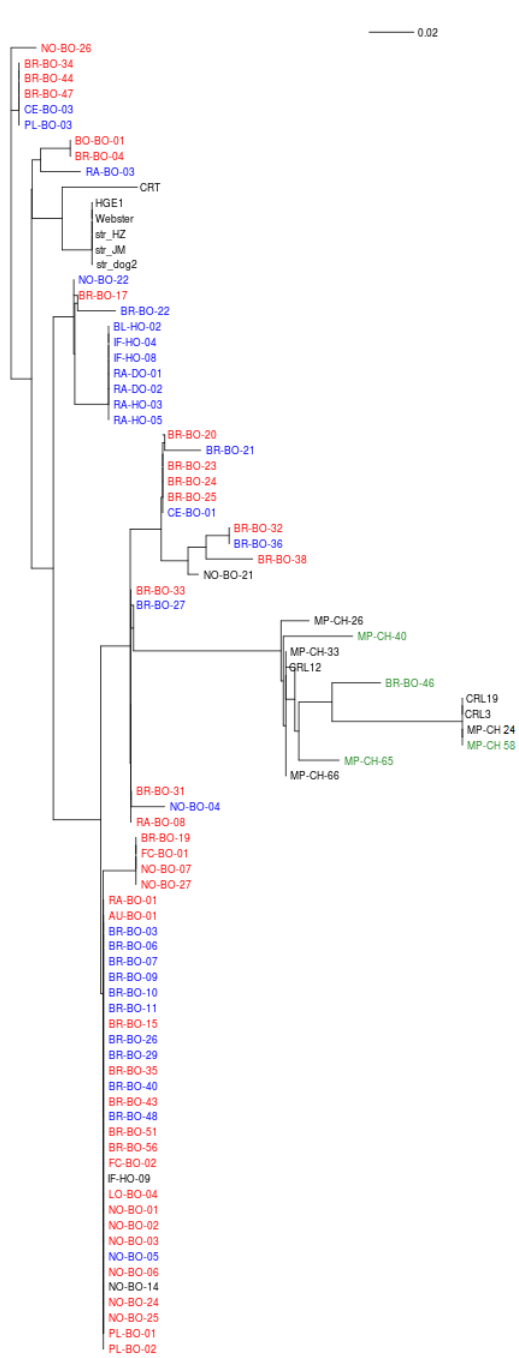

f)

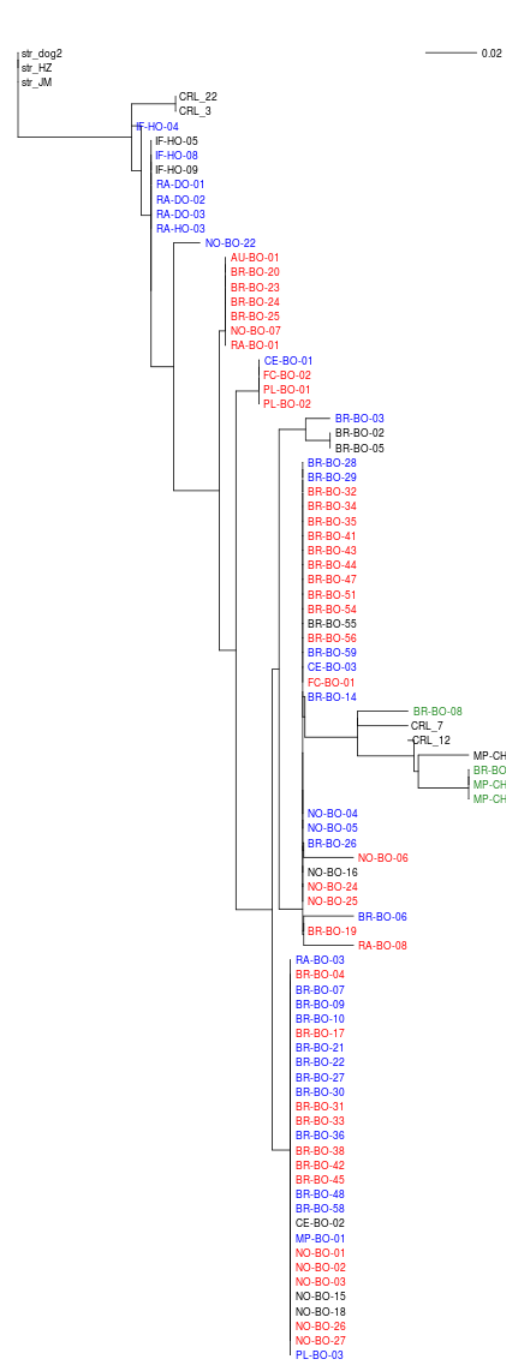

Supplement: MOESM3 [file 13567_2014_114_MOESM3_ESM.pdf]
